# Supplementary material
Source: PubMed Central journal article supplement (PMC4832624)
Supplement: supp_heartasia-2012-010167_heartasia-2012-010167supp_appendix.pdf [file supp_heartasia-2012-010167_heartasia-2012-010167supp_appendix.pdf]

**APPENDIX 1. Association between serum ALT and severity of maximum-measured cardiac troponin (cTnI) elevation within 24 hours of hospital admission for suspected acute coronary syndrome, restricted to those whose serum ALT was < 150 IU/L**

| Maximum cTnI by quartiles          | No. (%) with a serum ALT $\geq$ 90 <sup>th</sup> percentile |                                         | Odds ratio (95% CI) |                    |
|------------------------------------|-------------------------------------------------------------|-----------------------------------------|---------------------|--------------------|
|                                    | $\geq$ 90 <sup>th</sup> percentile (n = 20)                 | < 90 <sup>th</sup> percentile (n = 474) | Crude               | Adjusted*          |
| Quartile 1 (< 0.43 $\mu$ g/L)      | 3 (2.4)                                                     | 120 (97.6)                              | 1.00 (referent)     | 1.00 (referent)    |
| Quartile 2 (0.47-6.49 $\mu$ g/L)   | 1 (0.80)                                                    | 123 (99.2)                              | 0.33 (0.033-3.17)   | 0.38 (0.030- 4.32) |
| Quartile 3 (6.50-43.71 $\mu$ g/L)  | 1 (0.80)                                                    | 123 (99.2)                              | 0.33 (0.033-3.17)   | Unstable model     |
| Quartile 4 (> 43.71-150 $\mu$ g/L) | 15 (12.2)                                                   | 108 (87.8)                              | 5.56 (1.57-19.72)   | 3.99 (0.74-21.65)  |

\*Adjusted for age, sex, BMI, serum creatinine, any plasma glucose, serum triglycerides, serum LDL-C, and chronic statin or other lipid lowering agent use.
